# Supplementary material
Source: Springer Nature journal article supplement (https://www.springermedizin.de/resource/supplementary/13063_2008_271_MOESM3_ESM.pdf/9622444)

**Cummulative  
Z-Score**

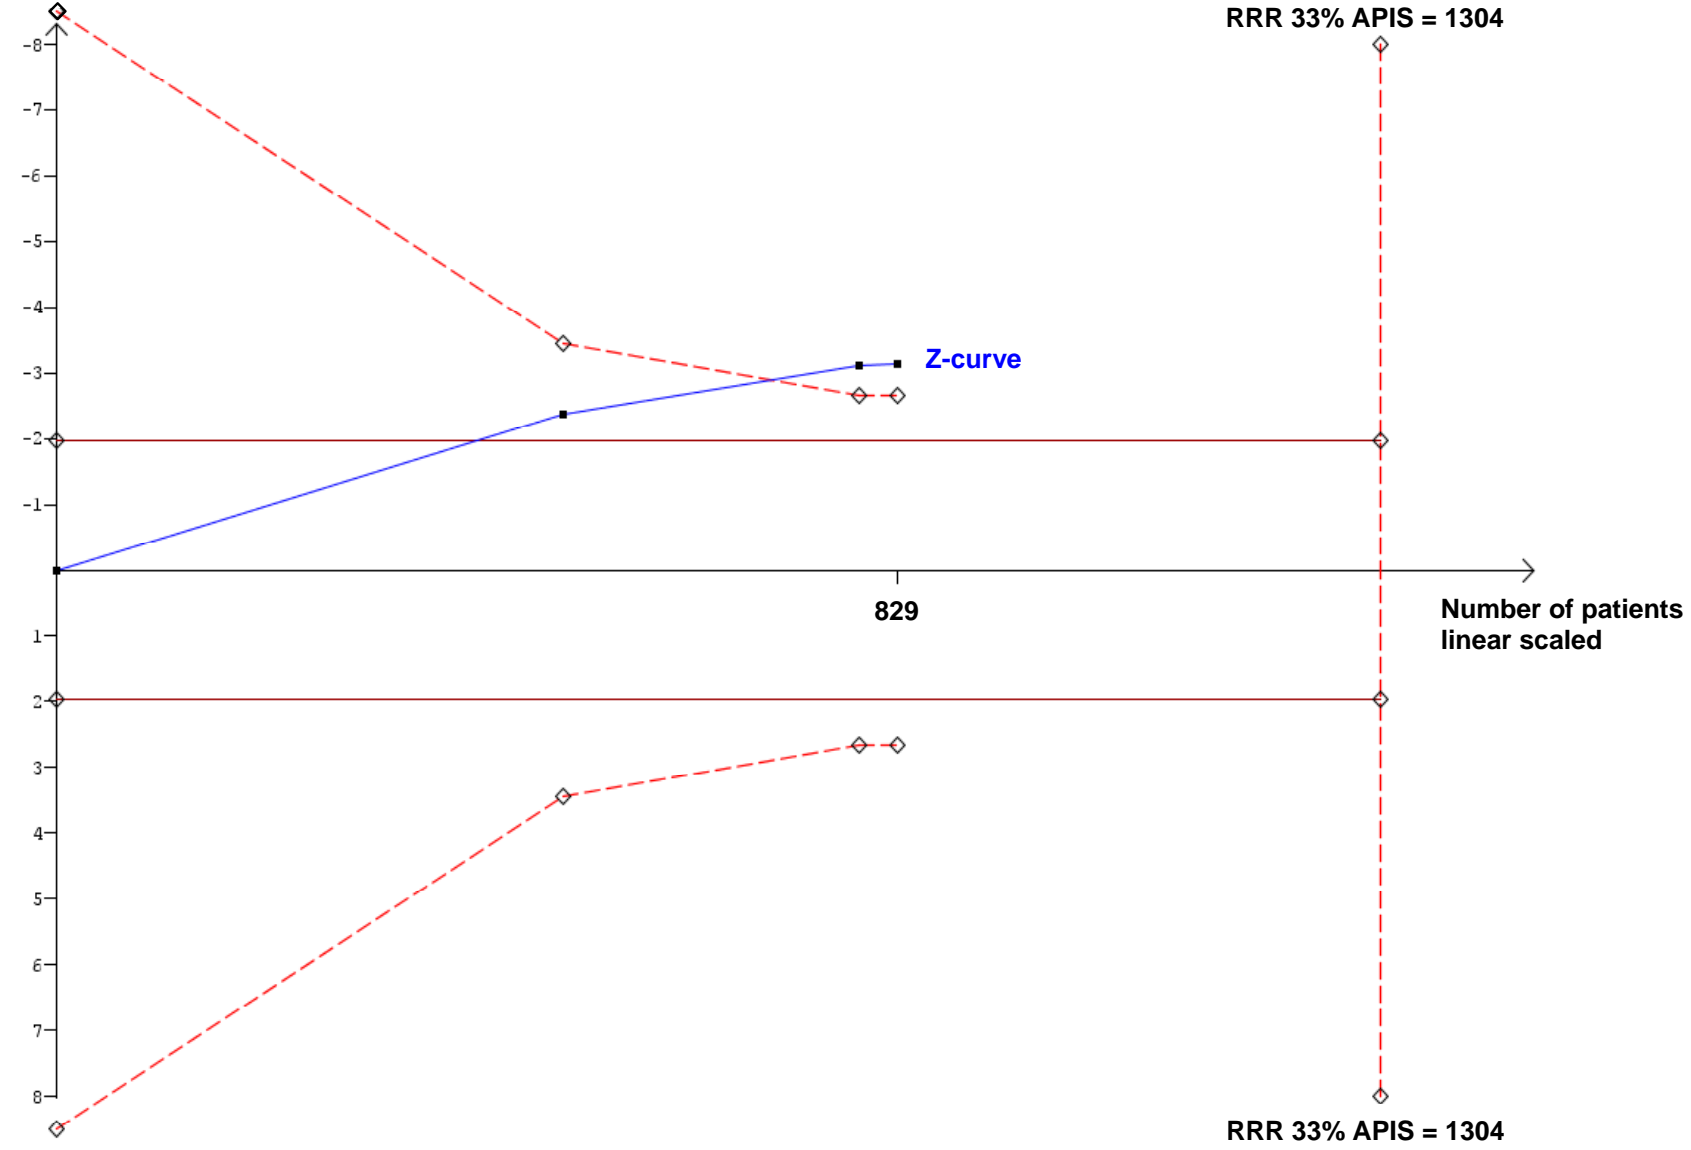

829

RRR 33% APIS = 1304

RRR 33% APIS = 1304

Z-curve

Number of patients  
linear scaled

Supplement: MOESM3 [file 9622444]
